# Supplementary material for: A Humanized and Defucosylated Antibody against Podoplanin (humLpMab-23-f) Exerts Antitumor Activities in Human Lung Cancer and Glioblastoma Xenograft Models
Source: MDPI journal article supplement (doi:10.3390/cancers15205080), 2023-10-20
Supplement: s1 [file s1]

**A****CHO/PDPN**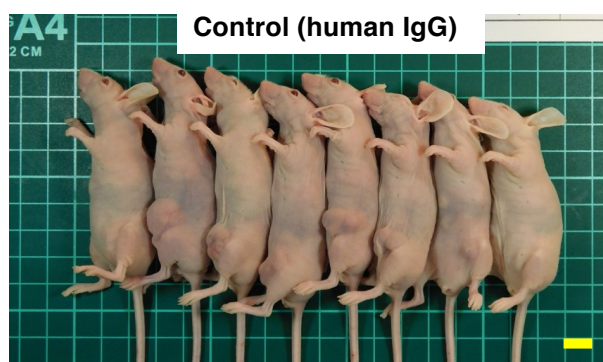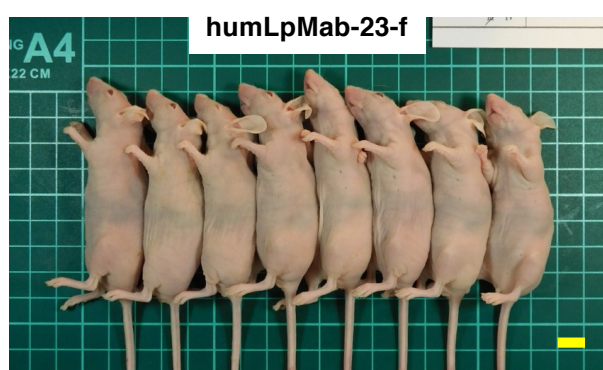**B****CHO-K1**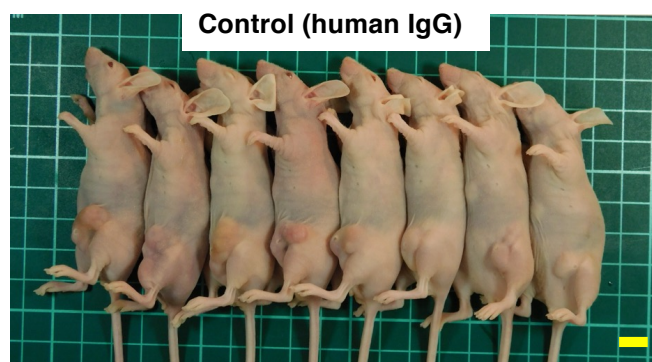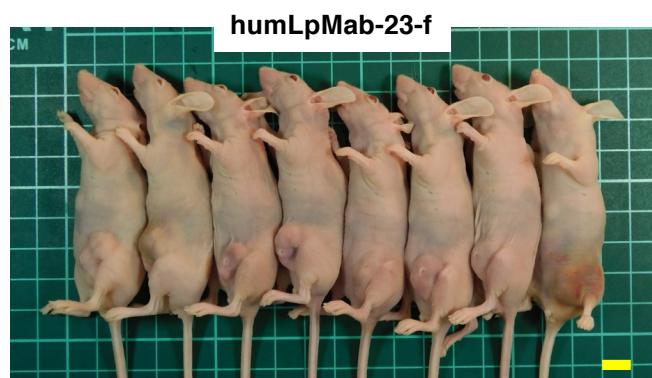

**Supplementary Figure S1.** Body appearance in CHO/PDPN (**A**) and CHO-K1 (**B**) xenografts-inoculated mice treated with human IgG and humLpMab-23-f on day 25. Scale bar, 1 cm.

**A****LN319**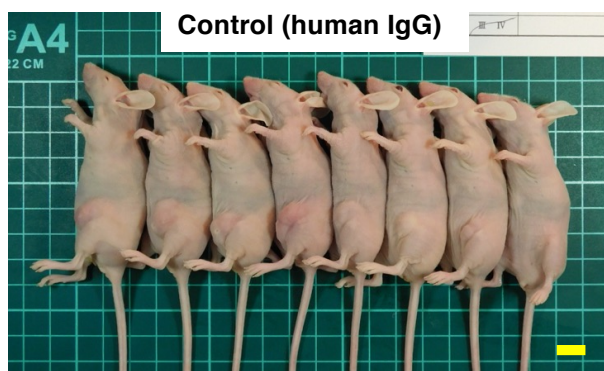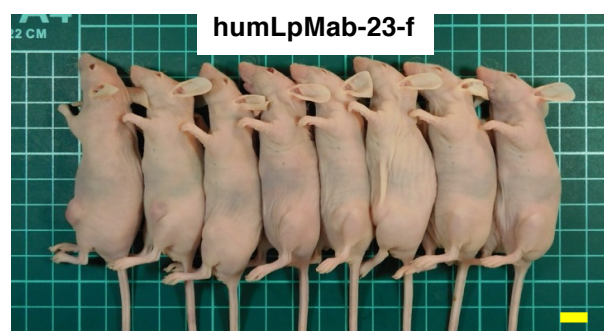**B****PC-10**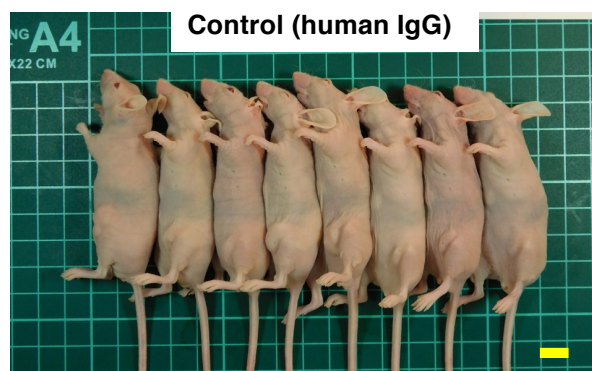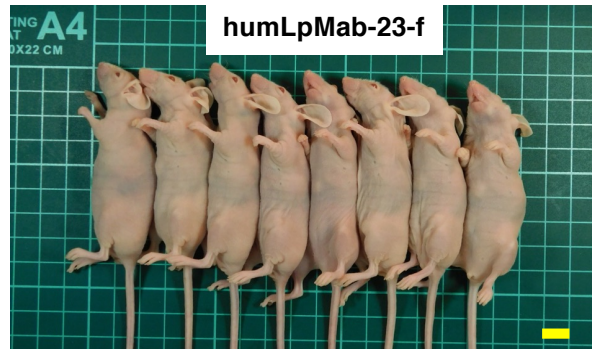

**Supplementary Figure S2.** Body appearance in LN319 (A) and PC-10 (B) xenografts-inoculated mice treated with human IgG and humLpMab-23-f on day 25. Scale bar, 1 cm.

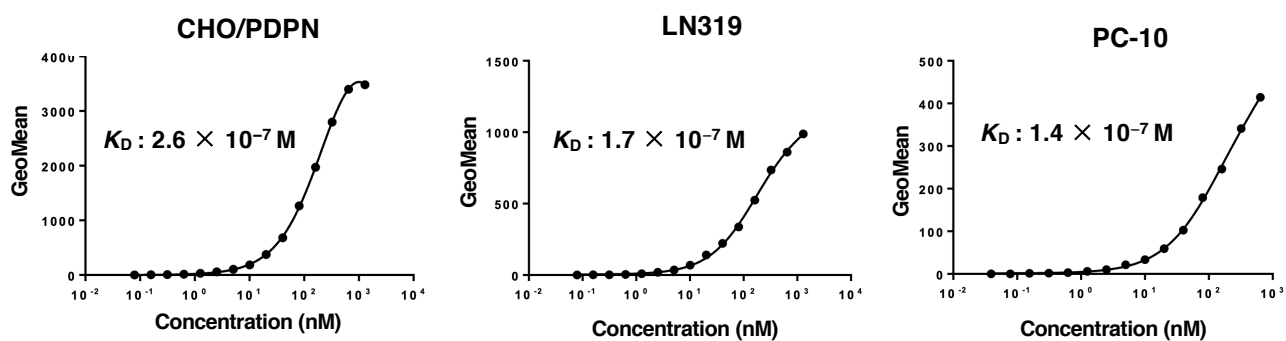

**Supplementary Figure S3.** Determination of the binding affinity of chLpMab-23 using flow cytometry. CHO/PDPN, LN319 and PC-10 cells were suspended in chLpMab-23 at indicated concentrations, followed by the addition of FITC-conjugated anti-human IgG. Fluorescence data were analyzed using the EC800 Cell Analyzer. The dissociation constant ( $K_D$ ) was calculated by GraphPad Prism 8.
